# Supplementary material for: Rottlerin Stimulates Exosome/Microvesicle Release Via the Increase of Ceramide Levels Mediated by Ampk in an In Vitro Model of Intracellular Lipid Accumulation
Source: MDPI journal article supplement (doi:10.3390/biomedicines10061316), 2022-06-03
Supplement: s1 [file s1]

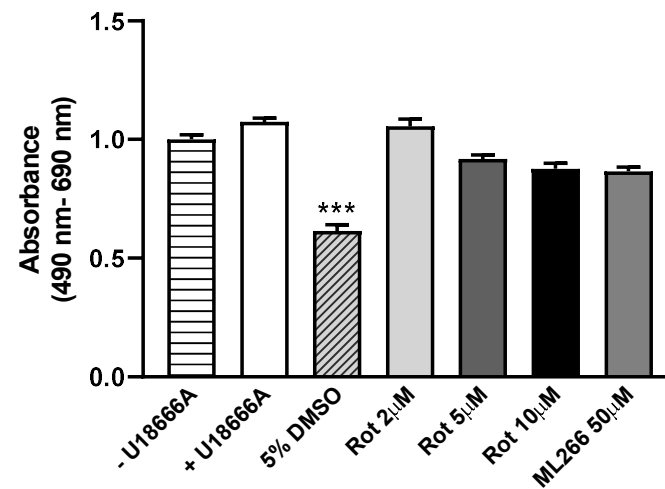

**Figure S1.** Effects of the drugs used on cell viability in C6 cells. Cells were exposed or not to 2.5 µM U18666A, rottlerin (2, 5 or 10 µM), or ML266 (a  $\beta$ -glucosidase activator) for 4 h, respectively. Then, the mitochondrial activity (XTT assay) was measured after the treatment. Values are the mean  $\pm$  S.E.M of three independent experiments with three replicates each. Statistical comparisons versus control are shown (\*\*\*)  $P < 0.001$ .

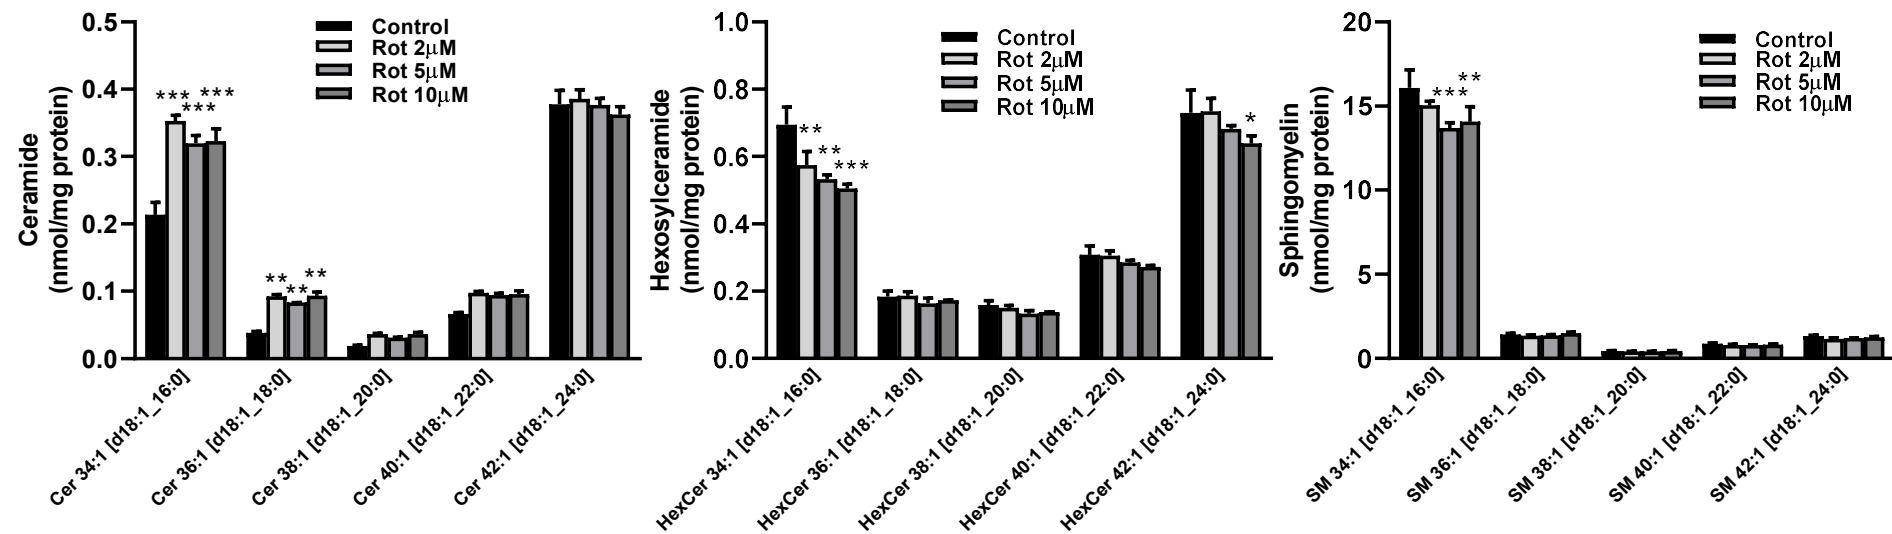

**Figure S2.** Effect of rottlerin on sphingolipids species content. Cells were incubated without (Control) or with increased doses of rottlerin (2, 5 and 10 µM, Rot) during 4 h. Ceramides, hexosylceramides and sphingomyelin were measured by MS as described in Methods. Results are mean ± SEM from 3 independent experiments. Statistical comparisons of treatments versus control are shown (\*\* P < 0.01 and \*\*\* P < 0.001).

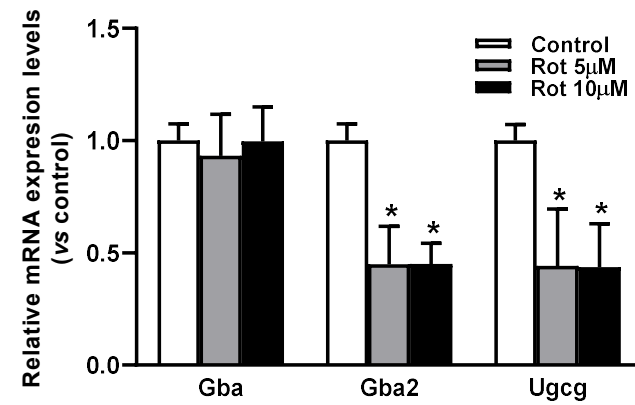

**Figure S3.** Effects of rottlerin on gene expression of enzymes involved in glucosylceramide metabolism. C6 cells were treated or not with rottlerin for 2 h or 4 h. At the indicated times, cells were collected, total mRNA was extracted, and individual mRNA species were quantified by qRT-PCR. Expression levels were normalized to the media of Gapdh and Rplp0 mRNA. Expression is presented as means  $\pm$  SEM of three independent experiments performed in triplicate. The control is normalized to 1.

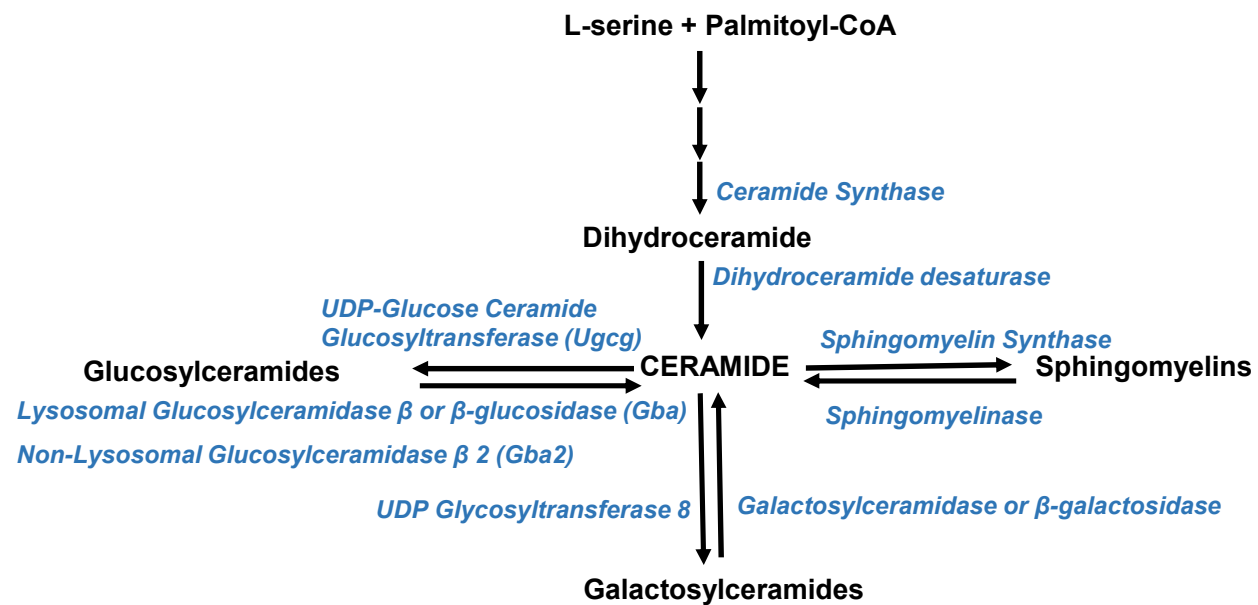

**Figure S4.** An overview of the sphingolipid metabolism pathway.

**Table S1.** Sequence of PCR primers used in quantitative real-time PCR.

| Gene  | Gen bank ID  | Forward Primer                | Reverse Primer                |
|-------|--------------|-------------------------------|-------------------------------|
| Gba   | NM_001127639 | 5'-GAGCAGAGTGTTTCGGTTAGG-3'   | 5'-GATTCAGGGCAAGGTTCCAG-3'    |
| Gba2  | NM_001013091 | 5'-TCGACATGTTCAATTCTGTACCC-3' | 5'-AAGCTGCCAACGACAGAACT-3'    |
| Ugcg  | NM_031795    | 5'-TCCGATGGGATATCATGGTT-3'    | 5'-TGAACCAAGCCACAGCATAA-3'    |
| Rplp0 | NM_022402    | 5'-GGCGACCTGGAAGTCCAAC-3'     | 5'-CCATCAGCACCCACAGCCTTC-3'   |
| Gapdh | NM_017008    | 5'-AGGTCGGTGTGAACGGATTTG-3'   | 5'-TGTAGACCATGTAGTTGAGGTCA-3' |
